# Supplementary material for: Accumulation and Competition Amongst Deformed Wing Virus Genotypes in Naïve Australian Honeybees Provides Insight Into the Increasing Global Prevalence of Genotype B
Source: PubMed Central journal article supplement (PMC7160646; doi:10.3389/fmicb.2020.00620), 2020-04-09
Supplement: Data_Sheet_1.pdf [file Data_Sheet_1.pdf]

## **Supplementary Material**

### **Accumulation and Competition Amongst Deformed Wing Virus Genotypes in Naïve Australian Honeybees Provides Insight Into the Increasing Global Prevalence of Genotype B**

Amanda M Norton, Emily J Remnant, Gabriele Buchmann, and Madeleine Beekman

This file contains

- Supplementary Figure S1-S4
- Supplementary Tables S1-S9
- Supplementary Text S1-S2
- Supplementary References

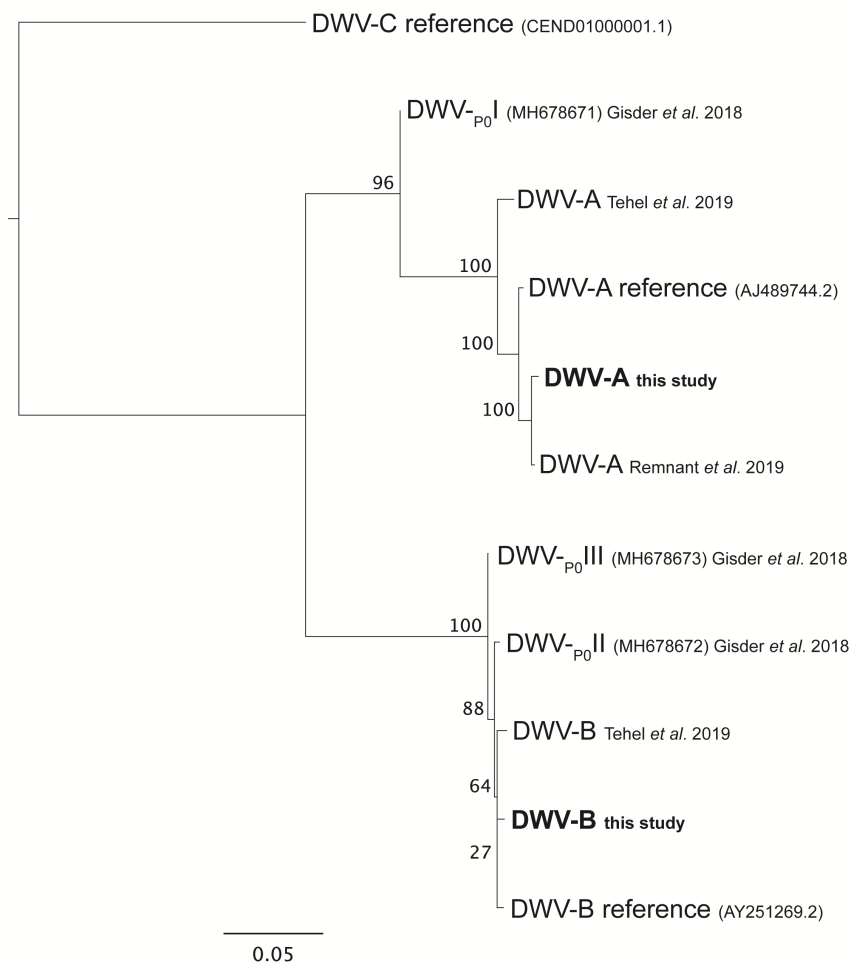

**Figure S1.** Phylogenetic tree comparing whole genome sequences of the DWV-A (accession number MN538208) and DWV-B (MN538209) inocula obtained in this study to isolates experimentally injected by Remnant *et al.* (2019), Tehel *et al.* (2019) and Gisder *et al.* (2018) (MH678671-73). DWV-A (AJ489744.2; Lanzi *et al.* (2006)), DWV-B (AY251269.2; Ongus *et al.* (2004)) and DWV-C (CEND01000001; Mordecai *et al.*, 2016)) were used as reference sequences, with DWV-C as the outgroup. The DWV-A and DWV-B whole genome sequences from this study were obtained from transcriptome sequencing (see Materials and Methods) and are highlighted in bold. Sequences were aligned in Geneious using Muscle and trimmed where required. Maximum likelihood trees were produced using PhyML HKY85 model after 100 bootstrap replicates.

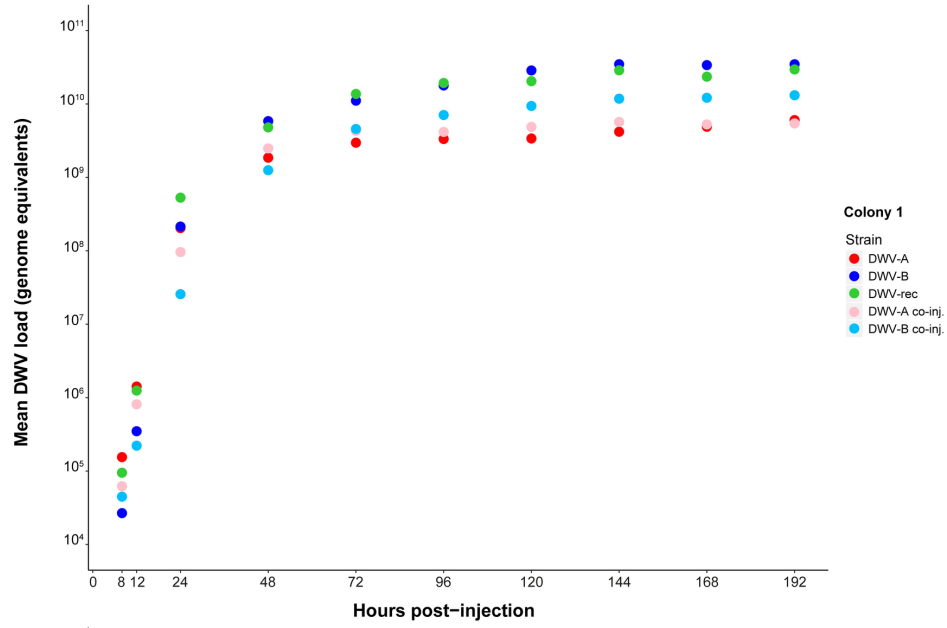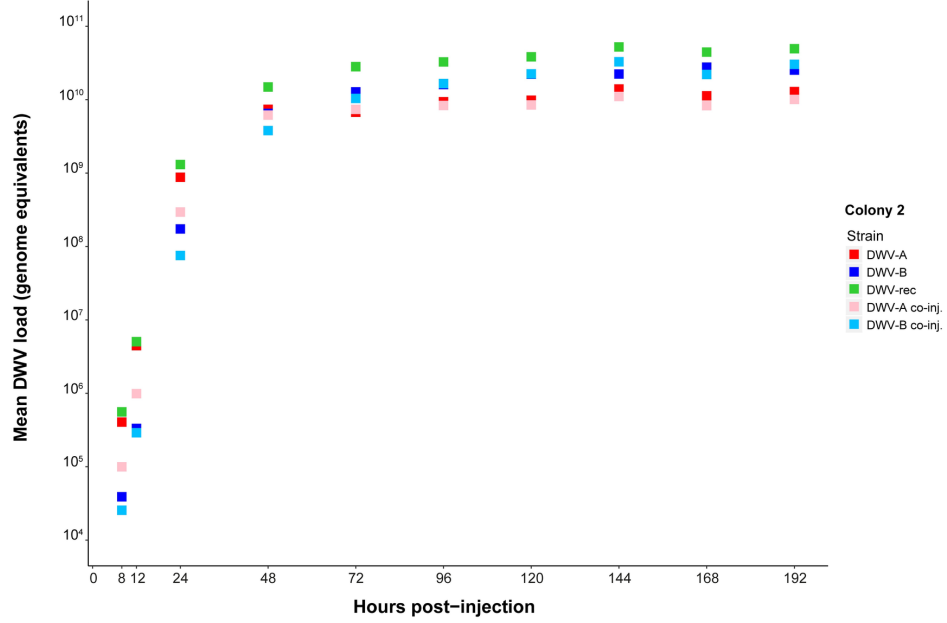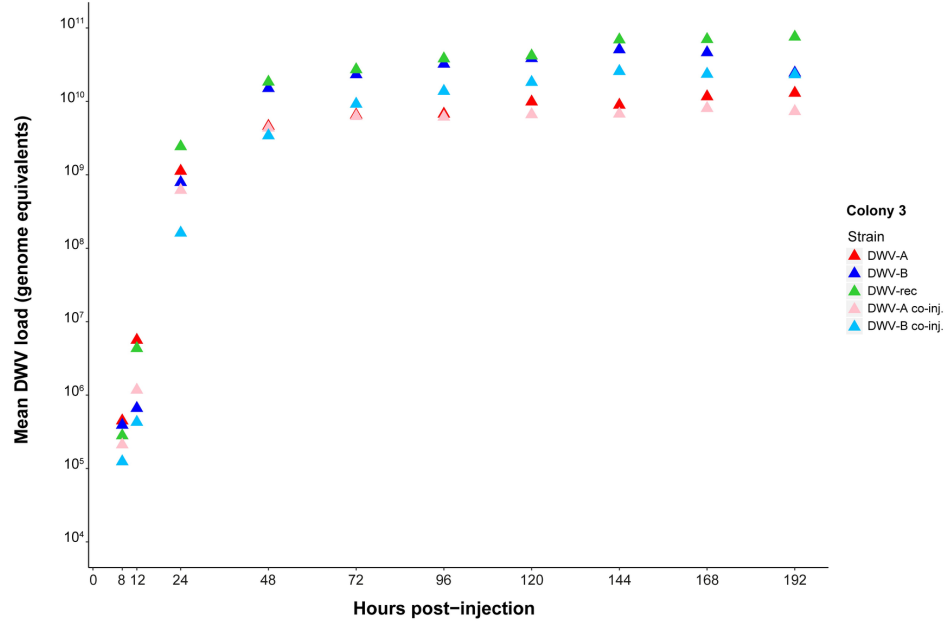

**Figure S2.** Mean DWV viral loads (genome equivalents) of individually infected pupae from 8 to 192 hours post-injection ( $n = 120$  per treatment), as calculated by standard curve in cDNA synthesized from  $0.8 \mu\text{g}$  RNA. White-eyed pupae from colonies one to three were singly injected with  $1 \times 10^7$  genome equivalents of DWV-A, DWV-B or recombinant strain ('DWV-rec'), or co-injected with  $5 \times 10^6$  genome equivalents of DWV-A and DWV-B. Each figure displays the mean viral load by colony to illustrate colony differences.

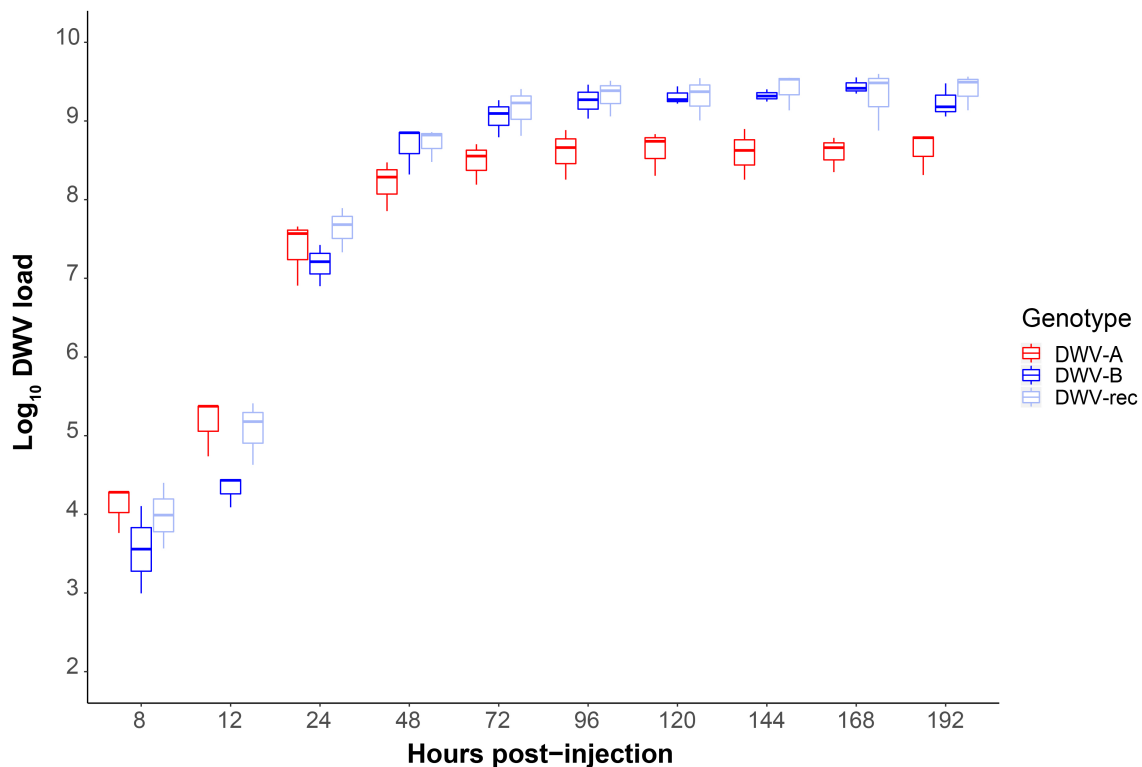

**Figure S3.** Log<sub>10</sub> DWV viral loads of singly infected pupae from 8 to 192 hours post-injection, relative to housekeeping gene *Actin*. Colonies 1-3 have been combined (per treatment) to illustrate the distribution of viral accumulation per genotype.

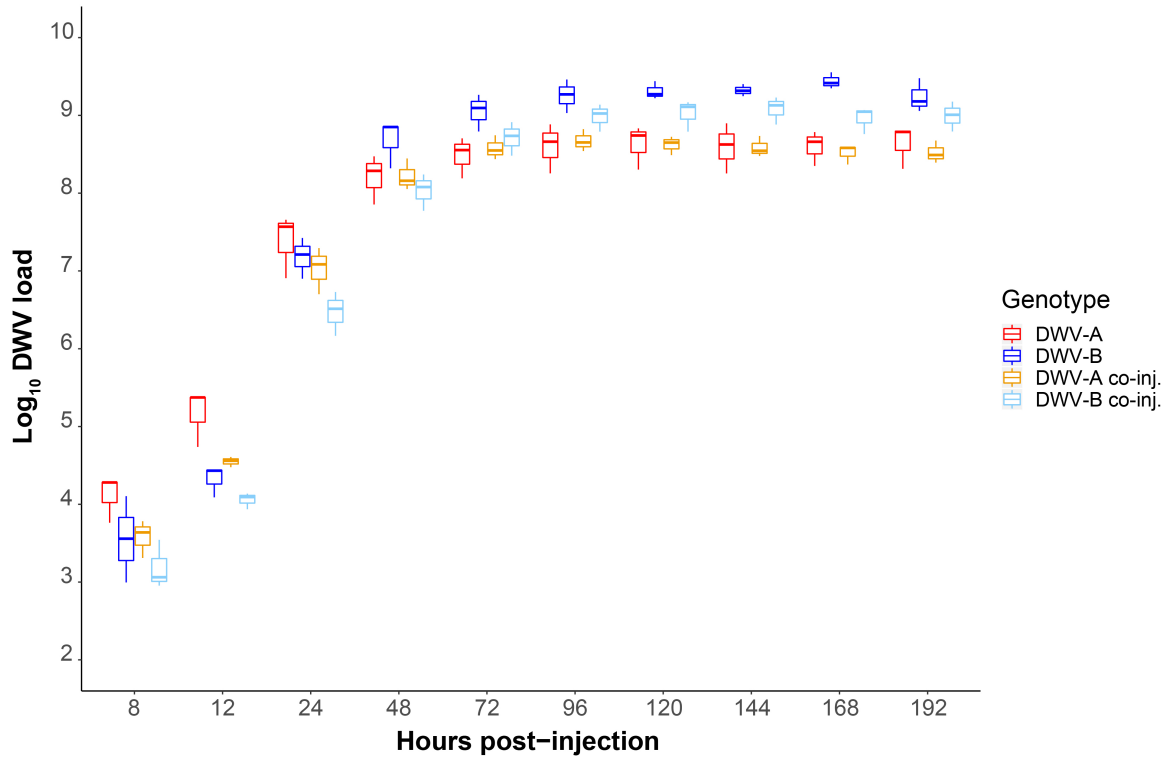

**Figure S4.** Comparison of log<sub>10</sub> DWV viral loads of pupae singly infected with DWV-A or DWV-B versus pupae co-injected with DWV-A and DWV-B, relative to housekeeping gene *Actin*. Colonies 1-3 have been combined (per treatment) to illustrate the distribution of viral accumulation per genotype.

**Table S1.** Comparison of pairwise identity values, generated from pairwise Muscle alignments of whole genome sequences in Geneious. DWV-A (MN538208) and DWV-B (MN538209) inocula sequences obtained in this study were compared to DWV-A (AJ489744.2) and DWV-B (AY251269.2) reference sequences, in addition to the DWV-A isolate we previously injected in Remnant et al. (Remnant et al., 2019) and those experimentally injected by Tehel et al. (2019) and Gisder et al. (2018).

|                                                   | DWV-A<br>(this study)<br>MN538208 | DWV-A<br>(AJ489744.2)<br>(Lanzi et al.,<br>2006) | DWV-A<br>Remnant et<br>al. (2019) | DWV-A<br>Tehel et al.<br>(2019) | DWV-p <sub>0</sub> I<br>Gisder et al.<br>(2018) | DWV-p <sub>0</sub> II<br>Gisder et al.<br>(2018) |
|---------------------------------------------------|-----------------------------------|--------------------------------------------------|-----------------------------------|---------------------------------|-------------------------------------------------|--------------------------------------------------|
| DWV-A<br>(AJ489744.2)                             | 98.50%                            |                                                  |                                   |                                 |                                                 |                                                  |
| DWV-A<br>Remnant et al.<br>(2019)                 | 99.50%                            | 98.72%                                           |                                   |                                 |                                                 |                                                  |
| DWV-A<br>Tehel et al.<br>(2019)                   | 97.30%                            | 97.70%                                           | 97.46%                            |                                 |                                                 |                                                  |
| DWV-p <sub>0</sub> I Gisder<br>et al. (2018)      | 91.20%                            | 91.50%                                           | 91.29%                            | 91.80%                          |                                                 |                                                  |
| DWV-p <sub>0</sub> II Gisder<br>et al. (2018)     | 84.70%                            | 85.00%                                           | 84.87%                            | 84.90%                          | 90.70%                                          |                                                  |
| DWV-p <sub>0</sub> III<br>Gisder et al.<br>(2018) | 85.80%                            | 85.90%                                           | 85.85%                            | 86.00%                          | 91.60%                                          | 94.50%                                           |

|                                                   | DWV-B<br>(this study)<br>MN538209 | DWV-B<br>(AY251269.2)<br>(Ongus et al., 2004) | DWV-B<br>Tehel et al.<br>(2019) | DWV-p <sub>0</sub> I<br>Gisder et al.<br>(2018) | DWV-p <sub>0</sub> II<br>Gisder et al.<br>(2018) |
|---------------------------------------------------|-----------------------------------|-----------------------------------------------|---------------------------------|-------------------------------------------------|--------------------------------------------------|
| DWV-B<br>(AY251269.2)                             | 99.30%                            |                                               |                                 |                                                 |                                                  |
| DWV-B<br>Tehel et al.<br>(2019)                   | 99.20%                            | 98.90%                                        |                                 |                                                 |                                                  |
| DWV-p <sub>0</sub> I Gisder<br>et al. (2018)      | 91.40%                            | 91.40%                                        | 91.40%                          |                                                 |                                                  |
| DWV-p <sub>0</sub> II Gisder<br>et al. (2018)     | 95.00%                            | 94.90%                                        | 94.90%                          | 90.70%                                          |                                                  |
| DWV-p <sub>0</sub> III<br>Gisder et al.<br>(2018) | 96.90%                            | 96.80%                                        | 96.80%                          | 91.60%                                          | 94.50%                                           |

**Table S2.** List of the primers used for viral detection by endpoint PCR and quantitative PCR. (ARV: *Apis* rhabdovirus, BQCV: black queen cell virus, DWV: deformed wing virus, LSV: Lake Sinai virus, SBV: sacbrood virus).

| <b>Virus</b>        | <b>Primer name</b> | <b>Sequence</b>        | <b>Product size (bp)</b> | <b>Primer efficiency</b> | <b>Reference</b>         |
|---------------------|--------------------|------------------------|--------------------------|--------------------------|--------------------------|
| <b>LSV</b>          | LSV_2108_F         | TCATCCMAAGAGAACCA      | 400                      | -                        | This study               |
|                     | LSV_uni_R          | GTCAAAGGTGTCGTATCC     |                          |                          |                          |
| <b>qPCR primers</b> |                    |                        |                          |                          |                          |
| <b>DWV</b>          | DWV_F              | TACTAGTGCTGGTTTTCTTT   | 155                      | 1.91                     | Kevill et al. (2017)     |
|                     | DWV-A_R            | CTCATTAAGTGTGTCGTTGAT  |                          |                          |                          |
|                     | DWV-B_R            | CTCATTAAGTGTGTCGTTGAT  |                          |                          |                          |
| <b>BQCV</b>         | BQCV_qPCR_F        | AGGTTTACGCTCCAAGATCG   | 112                      | 1.73                     | Remnant et al. (2019)    |
|                     | BQCV_qPCR_R        | TTTGTTTCAGCAGGTAATTGTT |                          |                          |                          |
| <b>SBV</b>          | SBV_qPCR_F         | CGAGGAGGGAAAACTACGC    | 115                      | -                        | Remnant et al. (2019)    |
|                     | SBV_qPCR_R         | GTGGCTTAAGTGTGTCGTTGAT |                          |                          |                          |
| <b>ARV-1</b>        | ARV-1_F            | ATGAGGCTTGGAGACACAGC   | 100                      | -                        | This study               |
|                     | ARV-1_R            | GGAGCTTTCCTGAGGACACG   |                          |                          |                          |
| <b>ARV-2</b>        | ARV-2_F            | CTAAACCCACCTGTCTGCC    | 150                      | -                        | This study               |
|                     | ARV-2_R            | ATTGAGCACTGGAGCGTTGG   |                          |                          |                          |
| <b>Actin</b>        | Actin_F            | TGCCAACACTGTCCTTTCTG   | 155                      | 1.70                     | Scharlaken et al. (2008) |
|                     | Actin_R            | AGAATTGACCCACCAATCCA   |                          |                          |                          |

**Table S3.** Two-way ANOVA comparing mean DWV loads relative to housekeeping gene *Actin* in pupae singly injected with DWV-A, DWV-B, DWV-rec, or co-injected with DWV-A and DWV-B, from 48 to 192 hours post injection ( $n = 401$ ). Comparison of DWV loads between genotype and colonies (1-3) over time. Data plotted in Figure 2 and Figure 3, where we have presented the mean relative viral loads as single injection by colony (DWV-A, DWV-B and DWV-rec), and single injection versus co-injection (DWV-A and DWV-B), respectively.

| <b>Summary</b>            | <b><i>df</i></b> | <b>Sum sq</b> | <b>Mean sq</b> | <b>F value</b> | <b><i>p</i></b> |
|---------------------------|------------------|---------------|----------------|----------------|-----------------|
| DWV genotype              | 4                | 344421        | 86105          | 248.642        | <0.0001         |
| hour post injection (HPI) | 1                | 76077         | 76077          | 219.685        | <0.0001         |
| colony                    | 2                | 102420        | 51210          | 147.876        | <0.0001         |
| DWV genotype:HPI          | 4                | 21228         | 5307           | 15.325         | <0.0001         |
| DWV genotype:colony       | 8                | 13400         | 1675           | 4.837          | <0.0001         |
| residuals                 | 381              | 131941        | 346            |                |                 |



**Table S4.** Tukey HSD post-hoc analysis of two-way ANOVA (S3 Table), showing pairwise comparisons of mean relative viral loads by genotype and colony. Lettering denotes genotype followed by numbering 1-3, which indicates colony (A: DWV-A single injection, B: DWV-B single injection, R: DWV-rec single injection, CA: DWV-A co-injection, and CB: DWV-B co-injection). Significant comparisons ( $p < 0.05$ ) denoted as letters on Figure 2 and Figure 3.

| Comparison | df  | t.ratio | p       | Comparison  | df  | t.ratio | p      |
|------------|-----|---------|---------|-------------|-----|---------|--------|
| A,1 - B,1  | 381 | -13.138 | <.0001  | R,1 - A,2   | 381 | 3.061   | 0.1358 |
| A,1 - CA,1 | 381 | -2.643  | 0.3451  | R,1 - B,2   | 381 | -9.501  | <.0001 |
| A,1 - CB,1 | 381 | -6.152  | <0.0001 | R,1 - CA,2  | 381 | 4.412   | 0.0013 |
| A,1 - R,1  | 381 | -11.214 | <.0001  | R,1 - CB,2  | 381 | -1.563  | 0.9654 |
| A,1 - A,2  | 381 | -8.205  | <0.0001 | R,1 - R,2   | 381 | -9.900  | <.0001 |
| A,1 - B,2  | 381 | -21.109 | <.0001  | R,1 - A,3   | 381 | 5.429   | <.0001 |
| A,1 - CA,2 | 381 | -6.931  | <.0001  | R,1 - B,3   | 381 | -5.388  | <.0001 |
| A,1 - CB,2 | 381 | -13.02  | <.0001  | R,1 - CA,3  | 381 | 6.912   | <.0001 |
| A,1 - R,2  | 381 | -22.646 | <.0001  | R,1 - CB,3  | 381 | 0.546   | 1.0000 |
| A,1 - A,3  | 381 | -5.679  | <.0001  | R,1 - R,3   | 381 | -9.075  | <.0001 |
| A,1 - CA,3 | 381 | -16.008 | <.0001  | R,2 - A,3   | 381 | 16.592  | <.0001 |
| A,1 - CA,3 | 381 | -4.175  | 0.0033  | R,2 - B,3   | 381 | 5.018   | <.0001 |
| A,1 - CB,3 | 381 | -10.871 | <.0001  | R,2 - CA,3  | 381 | 18.093  | <.0001 |
| A,1 - R,3  | 381 | -20.457 | <.0001  | R,2 - CB,3  | 381 | 11.874  | <.0001 |
| A,2 - B,2  | 381 | -12.71  | <.0001  | R,2 - R,3   | 381 | 1.955   | 0.0631 |
| A,2 - CA,2 | 381 | 1.337   | 0.9916  | CA,1 - CB,1 | 381 | -3.509  | 0.0371 |
| A,2 - CB,2 | 381 | -4.696  | <.0004  | CA,1 - R,1  | 381 | -8.62   | <.0001 |
| A,2 - R,2  | 381 | -14.311 | <.0001  | CA,1 - A,2  | 381 | -5.585  | <.0001 |
| A,2 - A,3  | 381 | 2.418   | 0.5027  | CA,1 - B,2  | 381 | -18.467 | <.0001 |
| A,2 - B,3  | 381 | -8.31   | <.0001  | CA,1 - CA,2 | 381 | -4.289  | 0.0021 |
| A,2 - CA,3 | 381 | 3.915   | 0.0091  | CA,1 - CB,2 | 381 | -10.377 | <.0001 |
| A,2 - CB,3 | 381 | -2.567  | 0.3956  | CA,1 - R,2  | 381 | -20.028 | <.0001 |
| A,2 - R,3  | 381 | -12.221 | <.0001  | CA,1 - A,3  | 381 | -3.089  | 0.1263 |
| A,3 - B,3  | 381 | -10.497 | <.0001  | CA,1 - B,3  | 381 | -13.572 | <.0001 |
| A,3 - CA,3 | 381 | 1.481   | 0.9783  | CA,1 - CA,3 | 381 | -1.582  | 0.9617 |
| A,3 - CB,3 | 381 | -4.983  | <.0001  | CA,1 - CB,3 | 381 | -8.229  | <.0001 |
| A,3 - R,3  | 381 | -14.502 | <.0001  | CA,1 - R,3  | 381 | -17.863 | <.0001 |
| B,1 - CA,1 | 381 | 10.545  | <.0001  | CA,2 - CB,2 | 381 | -6.089  | <.0001 |
| B,1 - CB,1 | 381 | 7.102   | <.0001  | CA,2 - R,2  | 381 | -15.779 | <.0001 |
| B,1 - R,1  | 381 | 1.891   | 0.8565  | CA,2 - A,3  | 381 | 1.118   | 0.9987 |
| B,1 - A,2  | 381 | 4.969   | <.0001  | CA,2 - B,3  | 381 | -9.62   | <.0001 |
| B,1 - B,2  | 381 | -7.576  | <.0001  | CA,2 - CA,3 | 381 | 2.626   | 0.3557 |
| B,1 - CA,2 | 381 | 6.337   | <.0001  | CA,2 - CB,3 | 381 | -3.94   | <.0083 |
| B,1 - CB,2 | 381 | 0.363   | 1.000   | CA,2 - R,3  | 381 | -13.655 | <.0001 |
| B,1 - R,2  | 381 | -9.206  | <.0001  | CA,3 - CB,3 | 381 | -6.493  | <.0001 |
| B,1 - A,3  | 381 | 7.319   | <.0001  | CA,3 - R,3  | 381 | -15.989 | <.0001 |
| B,1 - B,3  | 381 | -3.602  | <.0001  | CB,1 - R,1  | 381 | -5.177  | <.0001 |

|            |     |         |        |             |     |         |        |
|------------|-----|---------|--------|-------------|-----|---------|--------|
| B,1 - CA,3 | 381 | 8.802   | <.0001 | CB,1 - A,2  | 381 | -2.109  | 0.7284 |
| B,1 - CB,3 | 381 | 2.471   | 0.4639 | CB,1 - B,2  | 381 | -14.958 | <.0001 |
| B,1 - R,3  | 381 | -7.184  | <.0001 | CB,1 - CA,2 | 381 | -0.779  | 1.000  |
| B,2 - CA,2 | 381 | 14.178  | <.0001 | CB,1 - CB,2 | 381 | -6.869  | <.0001 |
| B,2 - CB,2 | 381 | 8.089   | <.0001 | CB,1 - R,2  | 381 | -16.551 | <.0001 |
| B,2 - R,2  | 381 | -1.730  | 0.9227 | CB,1 - A,3  | 381 | 0.353   | 1.000  |
| B,2 - A,3  | 381 | 15.026  | <.0001 | CB,1 - B,3  | 381 | -10.338 | <.0001 |
| B,2 - B,3  | 381 | 3.445   | 0.0454 | CB,1 - CA,3 | 381 | 1.862   | 0.8704 |
| B,2 - CA,3 | 381 | 16.54   | <.0001 | CB,1 - CB,3 | 381 | -4.720  | <.0003 |
| B,2 - CB,3 | 381 | 10.238  | <.0001 | CB,1 - R,3  | 381 | -14.42  | <.0001 |
| B,2 - R,3  | 381 | 0.259   | 1.000  | CB,2 - R,2  | 381 | -9.745  | <.0001 |
| B,3 - A,1  | 381 | -16.008 | <.0001 | CB,2 - A,3  | 381 | 7.091   | <.0001 |
| B,3 - CA,3 | 381 | 11.894  | <.0001 | CB,2 - B,3  | 381 | -4.008  | <.0064 |
| B,3 - CB,3 | 381 | 5.988   | <.0001 | CB,2 - CA,3 | 381 | 8.602   | <.0001 |
| B,3 - R,3  | 381 | -3.154  | 0.1062 | CB,2 - CB,3 | 381 | 2.149   | 0.7009 |
|            |     |         |        | CB,2 - R,3  | 381 | -7.680  | <.0001 |
|            |     |         |        | CB,3 - R,3  | 381 | -9.788  | <.0001 |

**Table S5.** Two-way ANOVA repeated as above, with the inclusion of three pupae with low DWV loads for their time-point.

| Summary                   | <i>df</i> | Sum sq | Mean sq | F value | <i>p</i> |
|---------------------------|-----------|--------|---------|---------|----------|
| DWV strain                | 4         | 351858 | 87965   | 167.09  | <0.0001  |
| hour post injection (HPI) | 1         | 65820  | 65820   | 125.03  | <0.0001  |
| colony                    | 2         | 94129  | 47064   | 89.40   | <0.0001  |
| DWV strain:HPI            | 4         | 21683  | 5421    | 10.20   | <0.0001  |
| DWV strain:colony         | 8         | 16258  | 2032    | 3.86    | <0.001   |
| residuals                 | 384       | 202685 | 526     |         |          |

**Table S6.** Tukey HSD post-hoc analysis of repeated two-way ANOVA (Table S5), showing the three pairwise comparisons that were significantly different in the repeated analysis.

| Comparison  | <i>df</i> | t.ratio | <i>p</i> |
|-------------|-----------|---------|----------|
| B,1 - B,3   | 384       | -3.038  | 0.144    |
| B,2 - B,3   | 384       | 2.74    | 0.2848   |
| CA,2 - CA,3 | 384       | 3.592   | 0.0282   |

**Table S7.** Analysis of the mean proportion of survival of pupae subjected to five treatments (buffer control, DWV-A, DWV-B, DWV-rec and co-injection) at 192 hours post injection. We fit a generalized linear mixed effects model (glmer) with binomial distribution and logit link function, comparing mean proportion of survival per treatment. Colony had no effect on survival (using Akaike’s information criterion during backward elimination; Table S9), thus was included in the model as a random factor. We then analysed the final model as a type II ANOVA. As treatment was a significant predictor of survival, we subsequently ran a Tukey pairwise comparison (Table S8).

| <b>Response: Proportion Survival</b> | <b>Chi sq</b> | <b>df</b> | <b>p</b> |
|--------------------------------------|---------------|-----------|----------|
| (Intercept)                          | 92.583        | 1         | < 0.0001 |
| treatment                            | 44.472        | 4         | < 0.0001 |

**Table S8.** Tukey post-hoc analysis of ANOVA (Table S7); pairwise comparisons of mean proportion of survival between treatments.

| <b>Comparison</b>             | <b>z. ratio</b> | <b>p</b> |
|-------------------------------|-----------------|----------|
| Buffer Control - DWV-A        | -4.384          | < 0.0001 |
| Buffer Control - DWV-B        | 1.835           | 0.3532   |
| Buffer Control - DWV-rec      | 0.280           | 0.9987   |
| Buffer Control - Co-injection | -2.586          | 0.0728   |
| DWV-A - DWV-B                 | 3.747           | 0.0017   |
| DWV-A - DWV-rec               | 4.467           | < 0.0001 |
| DWV-A - Co-injection          | 2.422           | 0.1095   |
| DWV-B - DWV-rec               | -1.671          | 0.4522   |
| DWV-B - Co-injection          | -3.036          | 0.0203   |
| DWV-rec - Co-injection        | -2.778          | 0.0435   |

**Table S9.** Model testing of mean proportion of survival data per treatment (buffer control, DWV-A, DWV-B, DWV-rec and co-injection) and colony. Akaike’s information criterion obtained during backward elimination showed that colony was not a significant predictor of survival. Colony was thus included as a random factor in survival analyses.

|           | <b>df</b> | <b>Deviance</b> | <b>AIC</b> | <b>LRT</b> | <b>p</b> |
|-----------|-----------|-----------------|------------|------------|----------|
|           |           | 512.07          | 526.07     |            |          |
| treatment | 4         | 579.34          | 585.34     | 67.275     | < 0.0001 |
| colony    | 2         | 514.71          | 524.71     | 2.641      | 0.267    |

**Text S1.** Partial contig sequence of the DWV-B isolate detected in low frequency in the DWV-rec inoculum, where Megahit average coverage per base was 408.0453.

>DWV-Rec\_Netherlands\_k141\_295\_multi=408.0453

```
AATCATATATTACTTTCTTAATTTTAAATAATAACATGGGCGATCGATTACAAACGGGCCTAACAACTTTCTCGCGCACAAAT
TTTGATGCCACCCGTTTCACTTTCTTACAAATCTTTGTATATTTGGGTTTCTTAAATACGAACTCACCCGCGTCTTTTCTACCT
CAATCTTAAGGGATTCTAAAGGGGAATATCTATTACTGATTGAAATGGGGACATGTTCTTGAACAGGGCGGCGGGTACATCT
TTCAGCTATAGAATATATCGTGTATAAAATTATTCAATTGTTCCGTAAGGAACTCATTATCACGCGCATCTTCTTGCTCCACGT
TGTATGATCATAACAGTGACGTCAAGAACGTTTGAATCCGTTCTGTTCACGCAACGCTTAATAACGCGTCGACGC
CTAGCTTCATCAATCTCCCAACTACGGGGAGCATGAGCTACAGAGGGAGCTTGGGCAACAGCAGCATAAGAAAGAGTTCCA
CAACTAAATGCCATTTTATATATATTTACCTCAAAGTCAAATCAAATTGAAAATATAAAATAAAAAGAATTGAATCTAA
TATATAAAGCAAAAATAGCAAAGAAATATATTTAGCAATAATGAAAATAGCAAAAATATAATAGCAAAAATAAACAGCAAAA
TAAAACAGCAATAATCGTAGCATAAAAATATAAATAATGTCTTTCCATTCGTCATCGTCTGGGCTATGTGACATTAACGGGT
GCCCTGCGAACGTAACGTACCGTGGCATAAATTATACTGTATTAAGGATTCTTGCCAAAGGAAATCCCAATACAGTCACT
TATGTATAGAGACATAAATTACTTTACACTTTTCGCCTCATAACA
```

**Text S2.** Partial contig sequence of the secondary DWV-recombinant isolate detected at very low frequency in the DWV-rec inoculum, where Megahit average coverage per base was 26.3092.

>DWV-Rec\_Netherlands\_k141\_7331\_multi=26.3092

```
AAGAATGGATATACGTGTTTAAAAGGTATCACTAATTTTGCTTCATTACTCGCTGATGCGCTAATCAAAGCATGATCCATATG
CGAAAAACCATAACACTTCGCTTCGCTCGGATATTCAAATTTTCATGATCCGAATAATACCAAGTTGCCTGTAATTGACCAA
CTTGAAATTTATTTGAATTAATTTGAACCTCTAATCTCCATATCGCCTCGCCAATATGCGTGCACCTTAAATGGGATAGTATTA
GGCACATCACATATAGCATCAGAATTAGCCTCTATACTAGATAACAAAGCACGAGGCAAAATTAACGTGCTAACTCCTTAT
CAAATGGATCATCCTTCGACCAAAACAAATTCAGCAATCTGATACCATCGAGATGTAATTGTGGCATAATCATCTACTACATC
ATTACTAGTCCATCTACTCCATTTTACGCTGACCGCGCTGGAATAGATGTACTAGGATCTCGTTGAGTCTGTTAAACAACAT
TACTATCCTTTTCTAATTCAACTTCACCCTCGCCATCAGGTCCTGGATTAGGGTTATCCATCTCTGGTTTTGCCTGCACCGGAT
TCGATAATTGTAACAGACTAGTGACACACTCTAACTCATAATCGCGCTGTTTTGACGTCGCAACATCCTAATCTGTTTTCTTA
ATCTATATAAATGCAAATCATAAATTATCTTCTTAAGCTTAAATAATAGCATAGGGGATCTAGAACATATAGGACGAACAAC
TTTTTCACGAACGAAGCGAGTTGCAACGCGCTTCACTTTCTTGCAAACGCGGTATATTTAGGTTTCTTAAATATACATTCCG
CTGCTTCTTGACCGACCTCGACCTTAAGGATTCCAGTGGAGCAAACCTATTCGAAACTGATATAGGAGAGTACTCTTTGATA
GGCCGACGCGTACAACGTTCAAGGATCGAATAAATAGTATATAAGTTGTTAATTGTTCCATTAGGAACTCATTATCGCGCGC
GTCCTCTGTTCCACGTTGCCTGGTGCATAGACGTACGCTCAAGCACGTTACGAATACGTTCTTGCTCCAACGCCAAACGTT
TAATAACTCGGCGCCGCTAGCTTCATCTACTTCCCATGTACGAGGTGCATGGGCGACAGATGGAGCTTGAGCGACGGCAGA
GTAAGAAAGAATTCCACAATAAATGCCATTTTATATATATTTACCTTGAAAATCAAATCAAATTGAAAATATAAAAATAA
AAAGAATTGAATCTAATATATAAAGCAAAAATAGCAAAGAAATATATTTAGCAATAATGAAAATAGCAAAAATATAATAGCA
AATAAAAACAGCAAAAATAAACAGCAATAA
```

## References

- Gisder, S., Möckel, N., Eisenhardt, D., and Genersch, E. (2018). In vivo evolution of viral virulence: switching of deformed wing virus between hosts results in virulence changes and sequence shifts. *Environmental Microbiology* 20(12), 4612–4628. doi: 10.1111/1462-2920.14481.
- Kevill, L.J., Highfield, A., Mordecai, J.G., Martin, J.S., and Schroeder, C.D. (2017). ABC Assay: Method Development and Application to Quantify the Role of Three DWV Master Variants in Overwinter Colony Losses of European Honey Bees. *Viruses* 9(11), 314. doi: 10.3390/v9110314.
- Lanzi, G., de Miranda, J.R., Boniotti, M.B., Cameron, C.E., Lavazza, A., Capucci, L., et al. (2006). Molecular and biological characterization of deformed wing virus of honeybees (*Apis mellifera* L.). *Journal of virology* 80(10), 4998-5009. doi: 10.1128/JVI.80.10.4998–5009.2006.
- Mordecai, G.J., Wilfert, L., Martin, S.J., Jones, I.M., and Schroeder, D.C. (2016). Diversity in a honey bee pathogen: first report of a third master variant of the Deformed Wing Virus quasispecies. *The ISME journal* 10(5), 1264-1273. doi: 10.1038/ismej.2015.178.
- Ongus, J.R., Peters, D., Bonmatin, J.M., Bengsch, E., Vlak, J.M., and van Oers, M.M. (2004). Complete sequence of a picorna-like virus of the genus *Iflavirus* replicating in the mite *Varroa destructor*. *Journal of General Virology* 85(12), 3747-3755. doi: 10.1099/vir.0.80470-0.
- Remnant, E.J., Mather, N., Gillard, T., Yagound, B., and Beekman, M. (2019). Direct transmission by injection affects competition amongst RNA viruses in honeybees. *Proceedings of the Royal Society B: Biological Sciences* 286(1895), 20182452. doi: 10.1098/rspb.2018.2452.
- Scharlaken, B., De Graaf, D.C., Goossens, K., Brunain, M., Peelman, L.J., and Jacobs, F.J. (2008). Reference gene selection for insect expression studies using quantitative real-time PCR: The head of the honeybee, *Apis mellifera*, after a bacterial challenge. *Journal of Insect Science* 8(33), 1-10. doi: 10.1673/031.008.3301.
- Tehel, A., Vu, Q., Bigot, D., Gogol-Döring, A., Koch, P., Jenkins, C., et al. (2019). The Two Prevalent Genotypes of an Emerging Infectious Disease, Deformed Wing Virus, Cause Equally Low Pupal Mortality and Equally High Wing Deformities in Host Honey Bees. *Viruses* 11(2), 114. doi: 10.3390/v11020114.
